1 **Original Article**

2 **Platelet proteolytic machinery assessment in Alzheimer's Diseases**

3 **Roy G. Muriu<sup>1</sup>, Jessica M. Sage<sup>1</sup>, Abdulkabi Agbas<sup>1</sup>**

4 <sup>1</sup>*Department of Basic Sciences, Kansas City University of Medicine and Biosciences, Kansas City, MO 64106* ,  
5 *USA*

6  
7 **Correspondence to:** Dr. Abdulkabi Agbas, Department of Basic Sciences, Kansas City University of Medicine and  
8 Biosciences, 1750 Independence Avenue, Kansas City, MO 64106 , USA, aagbas@kcumb.edu; ORCID:  
9 0000-0003-3854-7784

10 **Abstract**

11 **Aim:** Platelets provide substantial information about the proteolytic system profile in neurodegenerative  
12 diseases. Assessment of autophagy and proteasome activities in platelets may reflect tissue proteolytic  
13 system profile in central nervous system in Alzheimer's diseases (AD). We aimed to demonstrate the  
14 optimum assay conditions and identify target proteins in platelet proteolytic system.

15 **Methods:** Autophagosome forming proteins were identified by Western blotting analysis. Standard gel  
16 electrophoresis and electro transfer apparatus were used for protein transfer. Several vendors' products  
17 were tested to identify the best working antibodies and their concentrations were optimized. An ELISA  
18 kit was used for platelet proteasome protein determination. Infrared imaging technology was used for  
19 visualizing the proteins on the membrane. Platelet samples were obtained from clinically verified AD  
20 patients and age-matched non-demented control subjects that were recruited by University of Kansas  
21 Alzheimer's disease Center.

22 **Results:** Autophagosome forming proteins showed elevated levels in AD patient platelet cytosol. Only  
23 LC3-I autophagosome protein levels were significantly elevated. The platelet lysate proteasome  
24 concentrations were assessed. AD patient's proteasome levels were elevated but they were statistically  
25 not important as compared to controls.

26 **Conclusions:** Platelets can be used for assessing diseased protein levels and whether proteolytic system  
27 is functional. Blood-based sampling from human donors is less-invasive and analyzing platelet  
28 proteolytic system profile may help to develop pharmaceutical intervention approaches for  
29 neurodegenerative diseases in general.

30

31 **Keywords:** Autophagy, Proteasome, platelets, Alzheimer's disease, protein aggregation, TDP-43,  
32 neurodegeneration

33 **INTRODUCTION**

34 The purpose of this study is to demonstrate that human blood-derived platelets may provide critical  
35 information about malfunctioned proteolytic machinery leading to diseased protein aggregation in a  
36 neurodegenerative disease. Alzheimer's Disease (AD) is mainly characterized by protein aggregations  
37 and deposition that are toxic and lethal to cellular structures in the central nervous system<sup>[1]</sup>. The  
38 proteolytic system that includes autophagy and proteasome pathways, degrade and allow recyclization of  
39 targeted molecules and organelles in all eukaryotic cells (Fig.1). The reason certain proteins are

40 allowed to aggregate is the inhibition of proteolysis and down regulation of effector proteins that  
41 stimulate the pathogenesis of the degradation [2]. A dysfunctional proteolytic system, including autophagy  
42 and proteasome, is implicated in the pathogenesis of AD. Autophagy is a lysosomal degradative process  
43 by which cellular residents are inducted into homeostasis through quality control by clearance of  
44 pathogenic proteins, recycling of macromolecules, and response to energy requirements [3]. In  
45 neurodegeneration, this system has been proven to be dysfunctional and therefore associated with lack of  
46 proper protein disposal

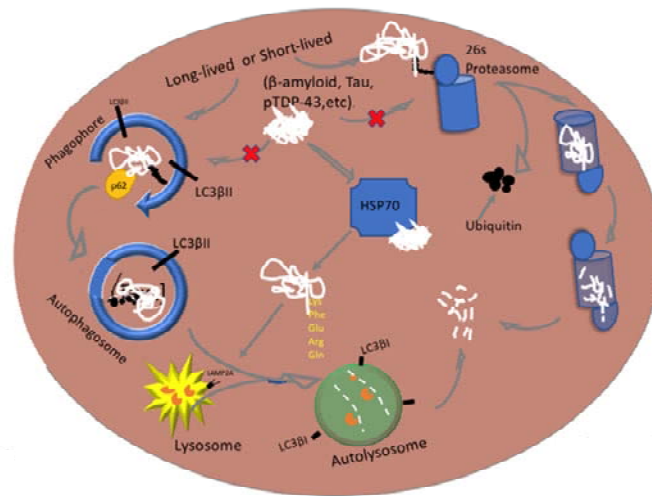

**Figure-1** Schematic diagram of the proteolytic system in autophagic and Proteasomal pathways.

64 and thereby aggregation [4]. A two-stage autophagy impairment (i.e., induction and lysosomal  
65 acidification) leads to pathogenesis of AD [2]. During the induction process, autophagy requires the  
66 release and presence of beclin-1 protein from endoplasmic reticulum and formation of a multimeric  
67 complex [2]. This is the site of autophagy initiation through vesicle nucleation then formation of isolation  
68 membrane [5]. Beclin-1 is a crucial regulator of autophagy and whose expression in the hippocampus is  
69 decreased at the RNA and protein level in AD especially with advanced age. This protein is necessary for  
70 nucleation of a phagophore membrane before the autophagosome vesicle is fully formed [6]. This concept  
71 produced comparative results against control subjects that demonstrated an increase in protein  
72 aggregation [7].

73 Proteasomes are molecular machines that degrade aberrant proteins through polyubiquitination process  
74 followed by recognition by regulatory particle, deubiquitylation by deubiquitinase (DUB), and finally  
75 degradation of proteins into fragments [8]. In AD, the components that are linked to this pathology are  
76 abnormal formation of ubiquitin and activity inhibition [9, 10]. For example, paired helical filaments of tau  
77 (PHF-tau) bind to proteasomes and thereby reduce its activity [9], resulting less polyubiquitination  
78 Without this step, a protein without proper ubiquitination cannot be recognized by the regulatory particle  
79 of the proteasomes [11]. Therefore, the autophagy and proteasome activities are a critical component and  
80 can be measured in platelets. Although the functions of autophagy within platelets are largely unclear but  
81 thus far, it is known that, its impairment leads to a lack of platelet aggregation and adhesion [12].

82 We have demonstrated that a TAR-DNA/RNA binding protein (TDP-43) and its phosphorylated  
83 derivative (pTDP-43) levels were elevated in platelets obtained from AD patients as part of the

84 blood-based biomarker development studies<sup>[13]</sup>. In this study, we hypothesize that platelets are known to  
85 have an active autophagic (specific aim-1) and proteasome (specific aim-2) machinery; therefore,  
86 autophagic and proteasome protein expression will be expected to be different in platelets from AD and  
87 non-demented individuals. We predict that previously observed TDP-43 protein accumulation<sup>[13]</sup> might  
88 be relevant to dysfunctional proteolytic system.

## 89 **METHODS**

90 1. *Human Platelets* : AD patients and age-matched non-demented control subject human platelets were  
91 obtained from the biorepository of University of Kansas Alzheimer's Disease Center under the  
92 approved IRB protocol (KUADC#11132). 5-6 days old platelets were obtained from a local  
93 community blood center (CBC) for initial studies before analyzing AD patients and control human  
94 platelet samples.

95 2. *Materials*:

96 2.1. *Antibodies*:

97 2.1.1. MBL antibodies (MBL International, 15A Constitution way, Woburn, MA 01801, USA):  
98 Anti-LC3 (pAb, PM036Y), Anti-LC3 (8E10, mAb, M186-3Y), Anti-LC3 (4E12, mAb,  
99 M152-3Y), Anti-Becclin-1 (pAb, PD017Y), Anti-Atg (pAb, PM040Y), Anti-p62  
100 (SQSTM1, pAb, PM045Y), Anti-Atg5 (pAb, PM050Y), Positive control for anti-LC3  
101 (PM036-PNY).

102 2.1.2. Cell signaling antibodies (Cell Signaling Technology, 3 Trask Lane, Danvers, MA 01923,  
103 USA): Anti-Becclin-1 (pAb, 3738S), LC3A (mAb, 4599S), LC3B (pAb, 2775S).

104 2.1.3. Abcam antibody (Abcam, Inc., 1 Kendall Square Suite, B2304, Cambridge, MA  
105 02139-1517, USA): p62 (SQSTM1, AB56416).

106 2.1.4. Secondary antibodies (LI-COR Inc., 4308 Progressive Ave., Lincoln, Nebraska 68504,  
107 USA): Goat anti-Mouse (green wavelength) antibody (Li-Cor, C40213-01), Goat  
108 anti-Rabbit (green wavelength) antibody (Li-Cor, C30829-02)

109 2.2. *SDS/PAGE and Western Blotting reagents*

110 Butanol, 1.5M Tris-HCl (pH 8.8), 1.0M Tris-HCl (pH 6.8), 10% Sodium Dodecyl Sulfate  
111 (SDS), N,N,N',N'-Tetra-methyl ethylenediamine (TEMED, Bio-Rad, 161-0801), 10%  
112 ammonium persulfate (APS) (Bio-Rad # 161-0700), 30% acrylamide and bis-acrylamide  
113 solution 29:1 (Bio-Rad, 1610156), urea (VWR, BDH4214-500G). Pre-Cast 4-20% gradient  
114 gel (Bio-Rad #456-1096 PVDF membrane (Millipore, Immobilon-FL Transfer Membranes  
115 IPFL00010) Membrane blocking agent, SeaBlock (ThermoFisher, # 37527); Total protein  
116 staining solution (REVERT Total Protein Stain kit, LI-COR Inc., # 926-11010; Pyronin Y  
117 (Sigma-Aldrich # P9172)

118 2.3. Protein concentration determination : Pierce™ bicinchoninic acid (BCA) protein assay kit  
119 (Thermo Scientific) (UB276872),

120 2.4. ELISA commercial kit: For quantifying proteasome (Enzo 20S/26S Proteasome ELISA Kit,  
121 Catalog # BML-PW0575-0001)

122 2.5. *Software*: Image Studio Lite (Ver.4.0) for image analyses. This software is part of Odyssey  
123 (LI-COR) image analyzer. Online-based free statistics calculator was used for statistical  
124 analysis (

125 <https://www.danielsoper.com/statcalc/calculator.aspx?id=47>)

126 2.6. *Experimental apparatus:*

127 2.6.1. Sonic dismembrator (Fisher Scientific, Model: XL2000-350)

128 2.6.2. Table top centrifuge (Eppendorf, Model: 5418)

129 2.6.3. Odyssey Infrared Imager (Model : 9120, LI-COR Inc., 4308 Progressive Ave. Lincoln,  
130 Nebraska 68504)

131 2.6.4. Mini Protean III Electrophoresis system (BioRad 165-3301)

132 2.6.5. Electro transfer system (Mini Trans-Blot Electrophoretic Transfer Cell Bio-Rad 170-3930)

133 2.6.6. Multi-well plate reader (Bio-Tek Cytation 5 or Bio-Tek Synergy HT)

134 3. Procedures:

135 3.1. *SDS/PAGE and Western Blotting:* The cytosolic proteins of platelet lysates from AD patients  
136 and control subjects were separated on a homemade 4-12% gradient gel with 1.5mm width 20  
137 well, MINI Protean II casted gel, using sodium dodecyl sulfate polyacrylamide gel  
138 electrophoresis (SDS-PAGE). The apparatus was filled with 1x electrophoresis buffer. With  
139 the gel inside the buffer containing cell, each lane was loaded with pyronin Y lane marker and  
140 30 µg total protein (1 mg/mL) Electrophoresis was performed at 75 volts for an average of 100  
141 min. until front dye (Pyronin Y) was at the bottom of the gel. The gel was removed from the  
142 sandwiched plates and processed for protein transferring to a methanol-activated  
143 polyvinylidene difluoride (PVDF) membrane. Electro-transfer process was carried out at 75  
144 volts for 30 minutes. Transfer buffer did not include methanol. The low-temperature of transfer  
145 unit was maintained by either inserting an ice-block or placing the transfer unit in an ice-filled  
146 container. The PVDF membrane was then stained for total protein visualization by total protein  
147 staining kit (REVERT, Total Protein Stain Kit LI-COR Inc., 926-11010). Transferred proteins  
148 were imaged by Odyssey (LI-COR) imaging system at the 700 nm set channel. The staining  
149 was optionally removed by incubating with REVERT reversal solution for a maximum of 10  
150 minutes as per protocol, then finally rinsed twice with nanopure water. The membrane was  
151 blocked in 2 mL of 1:1 Seablock /TBS buffer for 1 hour at room temperature (RT) on an orbital  
152 shaker. Afterwards, the membrane is directly transferred to a container with 10 mL of 1:1  
153 Seablock/TBST and primary antibody dilution in 1:500 or 1:1000 while incubating on an orbital  
154 shaker for overnight (at least 12 hours) at 4°C. Next day, the membrane was washed with 1X  
155 TBST for 20-minutes then incubated horseradish peroxidase conjugated secondary antibody,  
156 goat anti-mouse (LC3) and goat anti-rabbit (P62, Beclin-1, and Atg5-12) at 1:10,000 dilution  
157 for 1 hour at RT on an orbital shaker. Additional 20-minutes wash with 1x TBST was  
158 performed to remove unbound antibodies prior to imaging was completed. The membrane was  
159 scanned by Odyssey (LI-COR) imager and analyzed by densitometric quantification using  
160 Image Studio Lite (Ver.4.0).

161 3.2. *26s/20s Proteasome analysis by ELISA method:* We initially utilized platelets obtained  
162 from CBC to optimize the assay conditions for the proteasome quantification. Three sample  
163 fractions (i.e., whole platelet lysate, clear supernatant, and membranous pellet) were  
164 analyzed by proteasome ELISA kit. Whole platelet lysate (40 µg per assay well) for  
165 proteasome protein content determination in AD patients and in non-demented control

166 subjects. Assay procedure was performed according to the manufacturer provided protocol.  
167 Absorbance was read at 450 nm wavelength using a multi-well plate reader (Bio-Tek,  
168 Synergy HT). Standard curve was established and slope of the curve was used to determine  
169 the concentration of unknown sample proteasome 26s/20s.

170 **4. Statistical analyses :** The quantitative analysis for Western blots were performed using Image Studio  
171 Lite software program (V 4.0.) The quantitative value of autophagy protein markers represent  
172 arbitrary units (a.u.) based on the intensity of the bands. Statistical results were calculated by a  
173 two-tailed unpaired student t-test and Mann-Whitney U test. This was coupled with calculating the  
174 value of Cohen's d and the effect-size correlation, R, using the means and standard deviations of two  
175 groups (AD and control). Error bars on all data represents standard error of the mean ( $\pm$ S.E.M)

## 176 **RESULTS**

177 We have tested a battery of antibodies for probing autophagy protein purchased from three different  
178 vendors and compared to each other for selecting the best working antibodies. Individual platelet lysate  
179 samples from AD and control group (n=9) were analyzed by Western blotting technique using selected  
180 antibodies. The results from  
181 three replicates averaged and independently tested as an interval type of data. We only found an increase  
182 of LC3B-I ( $p \leq 0.02$ ) in AD when compared to Control (Fig.2). The select autophagosome proteins  
183 showed an elevated profile; however, there was no statistical difference between AD patients and control  
184 group.  
185

186

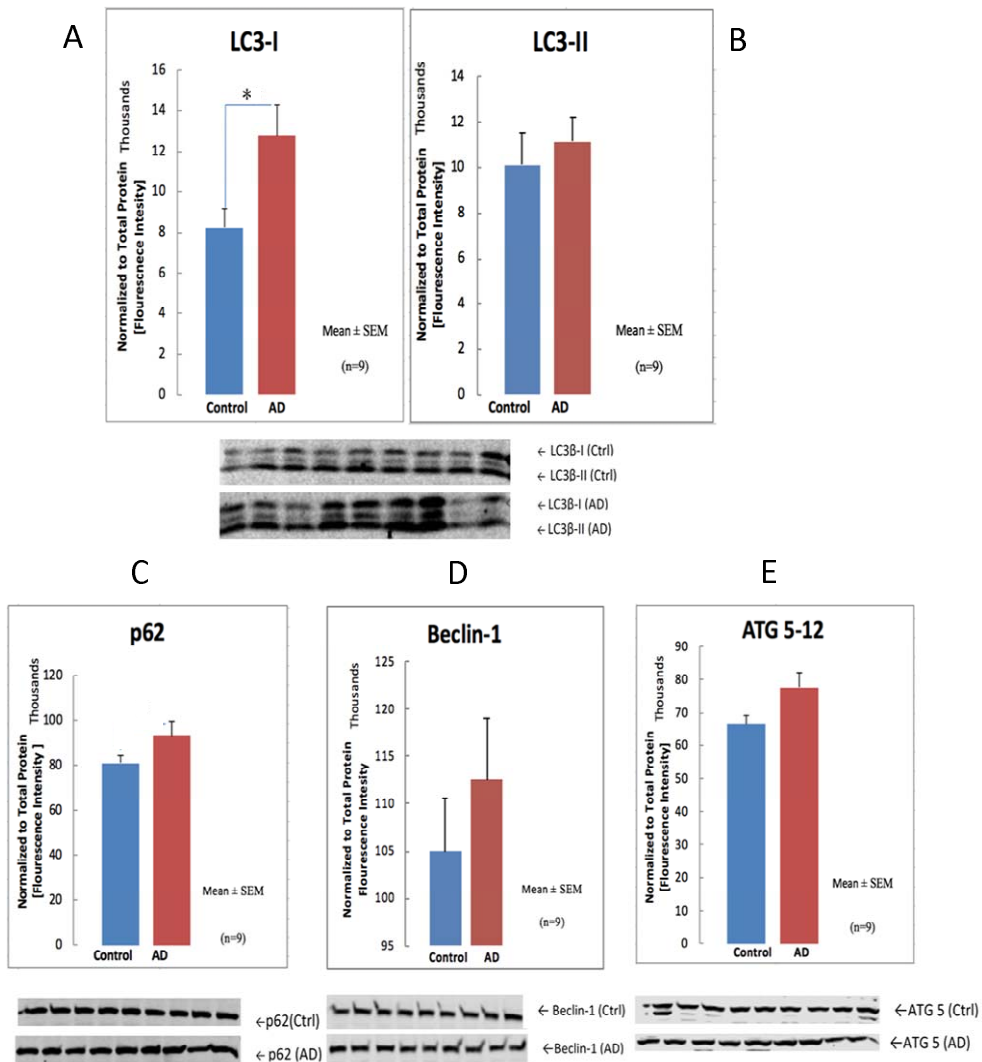

**Figure-2** Autophagy protein profiles in Human AD and in non-demented (control) platelet cytosols. Comparative analysis of autophagy proteins in platelet cytosols. The LC3B-I/II and Atg5-12 proteins were identified using antibodies from MBL vendor. The Beclin-1 was detected using Cell-Signaling antibody, and the p62 protein was detected by using Sigma-Aldrich antibody. Each samples were analyzed three times and Mean±SEM was presented. The protein band intensities were normalized to total protein staining. Student t-test was employed and only LC3B-1 showed the significance ( $p \leq 0.02$ ).

187

188

189

190 The proteasome concentrations of platelet lysates from AD and age-matched control subjects (n=12)  
191 were

192 assessed by ELISA method. Although AD patient platelet lysate proteasome levels were elevated, no

193 statistical difference between patient and control group was obtained (Fig.3)

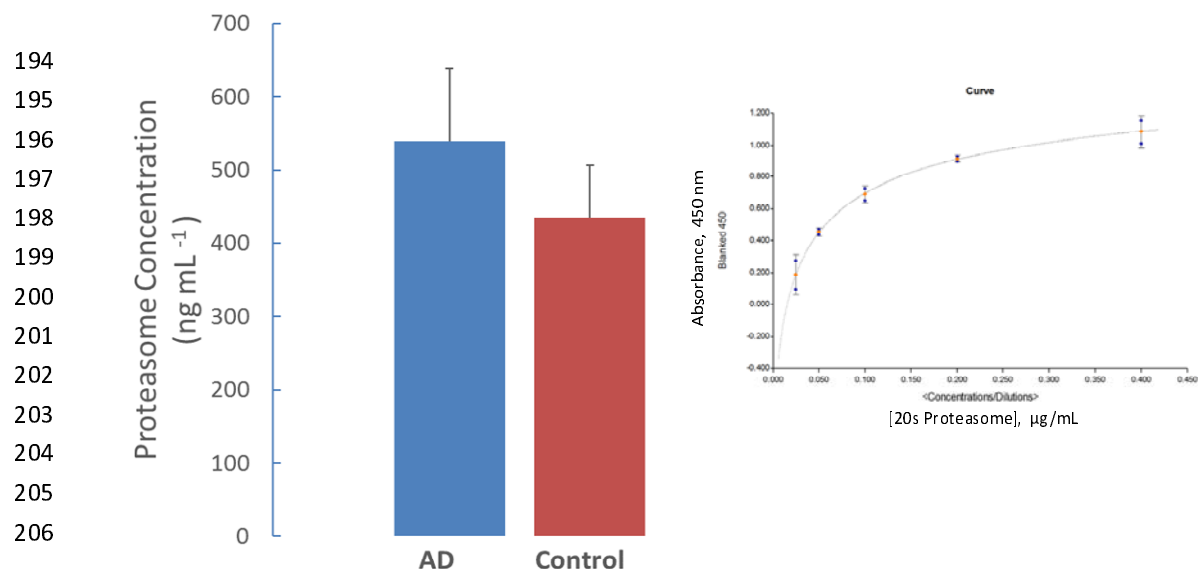

**Figure-3** Proteasome concentration measurements in whole platelet lysate. The bar graph represents the proteasome concentration in whole platelet lysate obtained from AD and control subjects (Mean±SEM; n=12). Although an increased proteasome protein profile observed in AD samples, no statistical importance was obtained. The inset figure shows a typical standard curve for quantifying proteasome 20s concentrations.

## 207 DISCUSSION

208  $A\beta_{1-42}$  is widely understood to accumulate in the early stages of the AD pathology. This malfunctioning  
209 protein recruits and triggers microglial, astrocyte facilitated clearance, but soon  $A\beta_{1-42}$  depositions  
210 overwhelm the response leading to microglia-mediated neuroinflammation<sup>[14-16]</sup>  $A\beta_{1-42}$  also stimulates the  
211 catalysis by NADPH oxidase. This enzyme activity increases reactive oxygen species production. The  
212 presence of these harmful chemicals activates Atg4, which cleaves and lipidates LC3-I with  
213 phosphoethanolamine (PE), as part of the induction of the autophagic pathway. Since AD is a multi-faceted  
214 disease, somehow the proteolytic system is suppressed due to downregulation<sup>[2, 6]</sup>, allowing for the  
215 characteristic extracellular amyloid plaques and neurofibrillary tangles to develop.

216 Some reports also recently discovered that platelets contain a proteolytic system by which hemostasis and  
217 thrombosis is acquired<sup>[17, 18]</sup>. Since it was also discovered that an elevation of pathological pTDP43 within  
218 the platelet cytosol is correlated to hippocampal cortex of AD patients<sup>[13]</sup>, it was imperative that we  
219 analyze these platelet proteolytic systems. We attempted to establish any change of the protein  
220 concentrations of proteolytic system, since platelet proteasome concentrations have not been reported prior  
221 to our studies. It was initially believed and hypothesized, based on aforementioned reports, the proteolytic  
222 system is somehow altered and that we would expect to observe some degree of variations in proteasome  
223 concentrations.

224 In specific aim-1, certain autophagy marker antibodies (i.e. Beclin-1, Atg5, p62, and LC3) were analyzed  
225 for autophagy forming proteins in platelets. This was in reference to previous autophagy activity  
226 measurements by Gupta et al<sup>[17]</sup>. The antibodies from multiple manufacturers have different affinities for  
227 a given sample. A series of antibody dilutions and platelet sample concentrations were optimized in order  
228 to match the best antibody /protein combination to be used in the assays. Those results suggested 30  $\mu$ g  
229 whole platelet lysate proteins paired with a primary antibody dilution of 1:1000 was ideal for future  
230 analysis.

231 Next, we evaluated only LC3A and LC3B antibodies in Western blotting. These findings distinguished that

232 human platelet samples are not sensitive to the detection of LC3B isoform. Other researchers have stated  
233 that out of the three possible isoforms (LC3A, LC3B, and LC3C). LC3A and LC3B autophagosome  
234 components exhibit distinct expression patterns in different human tissues<sup>[19]</sup>. After the final  
235 measurement of three replicates, the only reasonable results found were the proteins levels of LC3-I (a  
236 cleaved form of LC3). LC3-II (lipidated LC3-I) is a conjugated protein marker for platelet autophagy  
237 system<sup>[20]</sup>. Since there was no change in levels of LC3-II, the difference in LC3-I between the groups ( $p \leq$   
238 0.021) could be a result of autophagic pathway being blocked in its initial steps in AD<sup>[21]</sup>. The overarching  
239 implication we believe is that in AD, probably to alleviate aggregate stress, platelet allocated autophagy  
240 may be functionally upregulated and induced but inhibited in early or late steps of the pathway<sup>[20]</sup>. By only  
241 immunoblotting the for LC3, our results are more likely inconclusive. The immunoreactivity of LC3-I and  
242 LC3-II are different. LC3-II tends to be more sensitive to antibodies<sup>[21]</sup>. A stimulated autophagic pathway  
243 is represented by reduction of autophagy marker LC3II. So, when we analyzed that there was no change in  
244 LC3-II, its more indicative of no detection of flux than the changes of LC3-I. Therefore, an autophagy  
245 activity analysis assessment should be performed in freshly isolated intact platelets.

246 In specific aim-2, we assessed the proteasome concentration in platelet lysates. Proteasome 20S protein  
247 levels were measured by enzyme-linked immunosorbent assay (ELISA) techniques in cell lysates,  
248 supernatants, and pellets in CBC obtained healthy samples. We relied on supernatant isolations of platelet  
249 lysates to measure AD profiled proteasome concentrations. We found no statistical difference ( $p = 0.373$ )  
250 between AD patients and age-matched Control subjects in these platelet samples based on a two-tailed,  
251 student t-test and Mann-Whitney U test.

252 To assess the relationship of platelet proteolytic machinery protein levels in AD more effectively than the  
253 use of only p values we incorporated effect sizes<sup>[22, 23]</sup>. In addition to selecting a student t-test (interval,  
254 parametric), we also stepped down to a Mann-Whitney (ordinal, non-parametric) level of measurement.  
255 This was justified by the expression of a large variation in protein concentrations between individual  
256 samples within each group. Which means that our sample did not meet the parametric assumption of equal  
257 variances. This adjustment ascribed the data into ranked categories before comparing the median values  
258 between the groups.

259 Despite the statistical insignificance between the two groups means of Atg5-12, p62, Beclin-1, a measure  
260 of strength of an effect points to a promising conclusion in future analysis. A moderate to large standard  
261 deviations ( $d = 0.41-1.0$ ) and correlations ( $R = 0.36-0.44$ ) between AD and control were detected.  
262 Denoting a probability that there is a difference in autophagic pathway protein levels, but our sample is not  
263 large enough to produce statistical significance. On the other hand, the insignificance found between AD  
264 and control regarding LC3-II protein bands was coincided with a small magnitude of effect between  
265 groups. ( $d = 0.27$ ,  $R = 0.13$ ,  $p = 0.58$ ) (Fig.1B) About proteasome testing ( $p = 0.373$ ) its statistical  
266 insignificance was also matched with a small group effect ( $d = 0.34$ ,  $R = 0.17$ ).

267 In retrospect, there are some caveats and setbacks, largely rendering our results with a low difference. First,  
268 our continuous and averaged data comparison was statistically insignificant for all except one based on our  
269 sample cohort ( $n=9$  for autophagosome and  $n=12$  proteasome analyses). As mentioned before, human  
270 sample do have a tremendous variation in concentration and effect between each sample and group  
271 measurements. Especially with a small effect size for the main autophagy monitor, LC3-II, increasing the n  
272 value to ~220 per group ( $n=220$ ) should produce a significant t-test at a probability level of 0.05 for all  
273 samples<sup>[24]</sup>. Secondly, as it has been reported that LC3-I is unstable and sensitive to freezing-thawing  
274 cycles or SDS buffered cocktail<sup>[25]</sup>. Future samples should be freshly assessed and not exposed to a  
275 repeated freeze-thaw cycle. Thirdly, immunoblotting has its limitation of determining autophagic  
276 fluctuations. As we understand that LC3-II is the go-to marker, an increase in its presence could be due to  
277 several reasons. It could probably correlate with autophagosome accumulation but autophagic flux is not  
278 guaranteed<sup>[26]</sup>. In more relevance to AD neuropathology, beclin-1 is downregulated in this disease;  
279 however, LC3-II can still form without a phagophore and on ectopic membranes<sup>[21, 25]</sup>.



280 It is known that a neurodegenerative condition such as AD effects the periphery by increase in thrombin  
281 and von Willebrand factor (vWF) protein. Thrombin and vWF are platelet activators <sup>[18]</sup>. In AD, the  
282 patients are known to express an increased amount of vWF, which is partially used to convert quiescent  
283 platelets into activated platelets <sup>[27]</sup>. Hence, activated platelets of these patients produce and release more  
284 A $\beta$  into circulation compared to the controls <sup>[28]</sup>. A $\beta$  usually interacts with fibrin thereby promoting  
285 coagulation and fibrin aggregation. Therefore, an increase of A $\beta$  could mean an increase in platelet  
286 aggregation that implies an alternate flux in hemostasis. We did not analyze A $\beta$  peptide levels in platelet  
287 lysates of AD patients and age-matched control subjects in this study; however, we plan to include the  
288 platelet lysate A $\beta$ <sub>1-42</sub> measurements in a follow-up study

289 Since our results are supposed to be a testament of basal autophagy in quiescent platelets, AD derived  
290 samples might have already been activated when obtained from the patients. Activated platelets have  
291 increased autophagic pathway activity <sup>[18]</sup>. Therefore, the significant measurements might be due to that  
292 previous condition. The best way to adjust for that variable would be activate the control platelets before  
293 any protein concentration measurements. An alternative approach would be to inhibit the platelet  
294 activation factor by including an inhibitor (PGI<sub>2</sub>) during the platelet isolation from whole blood. Platelet  
295 proteolytic system analysis has allowed us to differentiate probable proteostasis between probable AD and  
296 control in cross-sectional fashion. It is clear that the elevated presence of TDP-43 is equally represented in  
297 AD brain homogenate segments of the hippocampus and isolated platelet lysates <sup>[13]</sup>. One of the  
298 possibilities that can be discerned from our study is that there may be elevated induction of autophagy,  
299 beyond basal amount. With a higher probability, somewhere along the autophagic pathway, there is  
300 suppression of progression into the pathway.

301 In light of this information, platelet autophagic profile may be similar to neurons of this disease profile.  
302 This study was meant to extrapolate the extent to which AD can influence the state of these systems during  
303 an elevated presence of disease-related proteins. From now on, we would need to use freshly obtained  
304 human samples, to include PGI<sub>2</sub> inhibitor during the platelet isolation, to increase our sample size to about  
305 220. Autophagy flux and proteasome assessment in intact platelet are necessary for obtaining more  
306 evidences that are conclusive. A similar cross-sectional study with a few adjustments should be considered  
307 before testing other neurodegenerative disease group in a similar fashion.

## 308 **DECLARATIONS**

### 309 **Authors' contributions**

310 Muriu, RG made substantial contributions to conception and design of the study and performed data  
311 analysis and interpretation  
312 Sage, JM performed data acquisition, as well as provided administrative, technical, and material support  
313 Agbas, A conceptualized the study, analyzed the data, and wrote the manuscript

### 314 **Availability of data and materials**

315 Not applicable

### 316 **Financial support and sponsorship**

317 Research reported in this publication was supported by several pilot project funds from QS85523J,  
318 University of Kansas Medical Center Research Institute, Inc.(QS85523J), FONTIERS-Trail Blazer  
319 Award (01-2429-001) and KCU intramural grants. The authors have no other relevant affiliations or  
320 financial involvement with any organization or entity with a financial interest in or financial conflict with  
321 the subject matter or materials discussed in the manuscript apart from those disclosed. No writing  
322 assistance was utilized in the production of this manuscript.

### 323 **Conflicts of interest**

324 All authors declared that there are no conflicts of interest

325 **Ethical approval and consent to participate**

326 The authors state that they have obtained appropriate institutional review board approval  
327 (KUADC#11132) or have followed the principles outlined in the Declaration of Helsinki for all human  
328 or animal experimental investigations. In addition, for investigations involving human subjects, informed  
329 consent has been obtained from the participants involved.

330 **Consent for publication**

331 Not applicable

332

333 **REFERENCES**

334

- 335 1. Tuite, M.F. and R. Melki, *Protein misfolding and aggregation in ageing and disease: molecular processes and therapeutic perspectives*. Prion, 2007. **1**(2): p. 116-20.
- 336 2. Ghavami, S., et al., *Autophagy and apoptosis dysfunction in neurodegenerative disorders*. Prog Neurobiol, 2014. **112**: p. 24-49.
- 337 3. Klionsky, D.J., *Autophagy: from phenomenology to molecular understanding in less than a decade*. Nat Rev Mol Cell Biol, 2007. **8**(11): p. 931-7.
- 338 4. Meijer, A.J. and P. Codogno, *Autophagy: regulation and role in disease*. Crit Rev Clin Lab Sci, 2009. **46**(4): p. 210-40.
- 339 5. Virgin, H.W. and B. Levine, *Autophagy genes in immunity*. Nat Immunol, 2009. **10**(5): p. 461-70.
- 340 6. Pickford, F., et al., *The autophagy-related protein beclin 1 shows reduced expression in early Alzheimer disease and regulates amyloid beta accumulation in mice*. J Clin Invest, 2008. **118**(6): p. 2190-9.
- 341 7. He, C., et al., *Exercise-induced BCL2-regulated autophagy is required for muscle glucose homeostasis*. Nature, 2012. **481**(7382): p. 511-5.
- 342 8. Gadhve, K., et al., *The ubiquitin proteasomal system: a potential target for the management of Alzheimer's disease*. J Cell Mol Med, 2016. **20**(7): p. 1392-407.
- 343 9. Keck, S., et al., *Proteasome inhibition by paired helical filament-tau in brains of patients with Alzheimer's disease*. J Neurochem, 2003. **85**(1): p. 115-22.
- 344 10. van Leeuwen, F.W., et al., *Frameshift mutants of beta amyloid precursor protein and ubiquitin-B in Alzheimer's and Down patients*. Science, 1998. **279**(5348): p. 242-7.
- 345 11. Chen, X. and D. Petranovic, *Role of frameshift ubiquitin B protein in Alzheimer's disease*. Wiley Interdiscip Rev Syst Biol Med, 2016. **8**(4): p. 300-13.
- 346 12. Feng, W., et al., *Dissection of autophagy in human platelets*. Autophagy, 2014. **10**(4): p. 642-51.
- 347 13. Wilhite, R., et al., *Platelet phosphorylated TDP-43: an exploratory study for a peripheral surrogate biomarker development for Alzheimer's disease*. Future Sci OA, 2017. **3**(4): p. FSO238.
- 348 14. Kinney, J.W., et al., *Inflammation as a central mechanism in Alzheimer's disease*. Alzheimers Dement (N Y), 2018. **4**: p. 575-590.
- 349 15. Hickman, S.E., E.K. Allison, and J. El Khoury, *Microglial dysfunction and defective beta-amyloid clearance pathways in aging Alzheimer's disease mice*. J Neurosci, 2008. **28**(33): p. 8354-60.

- 368 16. Rothhammer, V. and F.J. Quintana, *Control of autoimmune CNS inflammation by*  
369 *astrocytes*. *Semin Immunopathol*, 2015. **37**(6): p. 625-38.
- 370 17. Gupta, N., et al., *Proteasome proteolysis supports stimulated platelet function and*  
371 *thrombosis*. *Arterioscler Thromb Vasc Biol*, 2014. **34**(1): p. 160-8.
- 372 18. Ouseph, M.M., et al., *Autophagy is induced upon platelet activation and is essential*  
373 *for hemostasis and thrombosis*. *Blood*, 2015. **126**(10): p. 1224-33.
- 374 19. He, H., et al., *Post-translational modifications of three members of the human*  
375 *MAP1LC3 family and detection of a novel type of modification for MAP1LC3B*. *J Biol*  
376 *Chem*, 2003. **278**(31): p. 29278-87.
- 377 20. Zhang, X.J., et al., *Why should autophagic flux be assessed?* *Acta Pharmacol Sin*, 2013.  
378 **34**(5): p. 595-9.
- 379 21. Mizushima, N. and T. Yoshimori, *How to interpret LC3 immunoblotting*. *Autophagy*,  
380 2007. **3**(6): p. 542-5.
- 381 22. Lakens, D., *Calculating and reporting effect sizes to facilitate cumulative science: a*  
382 *practical primer for t-tests and ANOVAs*. *Front Psychol*, 2013. **4**: p. 863.
- 383 23. Nakagawa, S. and I.C. Cuthill, *Effect size, confidence interval and statistical*  
384 *significance: a practical guide for biologists*. *Biol Rev Camb Philos Soc*, 2007. **82**(4): p.  
385 591-605.
- 386 24. Sullivan, G.M. and R. Feinn, *Using Effect Size-or Why the P Value Is Not Enough*. *J Grad*  
387 *Med Educ*, 2012. **4**(3): p. 279-82.
- 388 25. Klionsky, D.J., et al., *Guidelines for the use and interpretation of assays for monitoring*  
389 *autophagy in higher eukaryotes*. *Autophagy*, 2008. **4**(2): p. 151-75.
- 390 26. Gimenez-Xavier, P., et al., *LC3-I conversion to LC3-II does not necessarily result in*  
391 *complete autophagy*. *Int J Mol Med*, 2008. **22**(6): p. 781-5.
- 392 27. Peyvandi, F., I. Garagiola, and L. Baronciani, *Role of von Willebrand factor in the*  
393 *haemostasis*. *Blood Transfus*, 2011. **9 Suppl 2**: p. s3-8.
- 394 28. Tang, K., et al., *Platelet amyloid precursor protein processing: a bio-marker for*  
395 *Alzheimer's disease*. *J Neurol Sci*, 2006. **240**(1-2): p. 53-8.

396
